# Supplementary material for: Network structure underpinning (dys)homeostasis in chronic fatigue syndrome; Preliminary findings
Source: PLoS One. 2019 Mar 25;14(3):e0213724. doi: 10.1371/journal.pone.0213724 (PMC6433252; doi:10.1371/journal.pone.0213724)
Supplement: S4 File — (CSV) [file pone.0213724.s010.csv]

Variable	MRC 001	MRC 004	MRC 006	MRC 008	MRC 009	MRC 010	MRC 011	MRC 012	MRC 013	MRC 014	MRC 015	MRC 016	MRC 017	MRC 019	MRC 021	MRC 022	MRC 023	MRC 030	MRC 031	MRC 033	MRC 035	MRC 036	MRC 037	MRC 039	MRC 040	MRC 041	MRC 043	MRC 045	MRC 046	MRC 048	MRC 050	MRC 051	MRC 052	MRC 055	MRC 056	MRC 059	MRC 060	MRC 062	MRC 063	MRC 064	MRC 070	MRC 074
SBPa	145.3	129.92	121.35	92.04	133.95	103.68	102.66	109.81	103.24	145.3	89.19	165.98	158.95	130.74	59.98	66.53	128.21	96.67	125.51	120.03	115.8	114.47	117.86	96.63	110.24	136.81	147.05	100.37	81.37	98.59	99.96	89.89	64.06	131.33	101.62	95.77	117.32	78.89	94.28	83.03	101.17	114.8
EF	67.4	63	60.5	67.2	77.8	63.6	65.7	69.1	66.2	63.4	55.6	61.9	70.3	63.6	60.1	61.6	68.8	63.7	57.1	52	62.2	64.5	59.3	59.9	64.6	66.9	59.2	60.7	63.5	56.7	50.5	63.4	65.5	66.6	69.7	70.8	65.7	55.2	63.3	64.9	67.8	66.5
SV	51.7	36.8	47.3	81	52.4	71.1	54.9	65.7	64.3	64.3	42.3	55.3	46.3	50.3	50.2	35.8	45.2	56.9	50.8	67.8	82.9	50.3	89.8	62	61.7	74.2	47.6	56.1	60.7	49.6	47.5	50.3	48	88.1	48.7	57.2	61.3	39.4	58.2	67.7	47.5	68
HR	55	77	64	56	72	60	74	60	48	62	60	75	69	73	65	90	72	59	82	61	56	69	52	65	60	78	67	70	50	79	75	75	95	64	60	77	63	61	74	60	62	73
EDV	76.6	58.4	78.1	120.5	67.4	111.7	83.5	95.1	97.1	101.5	76.2	89.3	65.8	79.1	83.4	58	65.7	89.3	88.8	130.2	133.3	78	151.4	103.5	95.5	110.9	80.4	92.3	95.5	87.4	94	79.2	73.2	132.4	69.8	80.8	93.4	71.4	92	104.3	70	102.2
MASS	84.7	49	59.5	97.6	62.7	93.1	83.2	74.8	52.8	102.4	44.4	95.2	65.9	52.4	44.9	89.8	66	94.5	78.3	117.7	76.9	46.4	103	53.1	44.2	80.9	52.3	60.5	43.6	62.4	57.7	56.5	68.6	87.4	78.6	55.9	54.5	63.4	75	68.1	48	67
BPV	2.777	9.023	7.2105	2.9175	1.816	3.8825	5.7935	2.279	9.381	5.459	7.684	2.408	0.825	5.4215	1.283	0.756	0.469	8.5625	3.133	4.1535	1.7345	1.2195	5.663	0.941	5.082	23.824	0.951	3.289	2.676	6.4755	3.292	3.696	3.009	0.8415	9.036	19.1765	3.928	5.842	2.041	11.088	10.857	2.8935
HRV	1.206	4.061	1.4365	1.292	0.876	1.7595	1.861	1.9495	2.0315	1.3295	2.812	5.0115	1.119	2.142	0.4265	0.865	0.487	2.3525	2.929	1.801	0.4295	0.632	1.2595	1.193	1.029	8.4095	0.7945	2.157	0.702	1.2935	0.664	1.089	1.4605	0.917	1.391	3.4065	1.823	1.178	2.136	0.924	3.0185	0.743
BEI	71.681	53.03	50.769	48.462	70.811	61.905	64.762	82.796	61.842	68.182	70.149	32.919	47.442	38.636	71.579	55.556	60.687	50.943	62.222	67.742	58.333	60	50	44.211	86.607	92.969	62.069	41.935	63.158	85.714	64	75	32.231	81.579	46.067	78.571	94.574	81.579	38.281	48.98	86.585	73.077
SBPv	130.50345	160.6734	128.99225	127.70505	154.2416	130.09925	125.06135	122.06205	127.6992	101.233405	134.1993	162.06755	160.26605	147.0831	84.13246	99.24616	133.28255	114.52015	145.51465	124.56165	118.73965	121.7667	129.54295	116.6939	135.22215	146.57545	175.41435	129.95235	92.96882	93.73325	117.82855	105.0282	98.728855	135.60245	119.99795	103.50508	129.2395	112.4435	111.573845	58.113935	142.3023	153.9677
DBPa	103	86.38	83.29	54.26	103.33	75.1	69.68	79	74.03	103	72.88	102.84	105.32	100.3	44.28	40.81	88.07	63.81	76.75	77.01	56.85	76.05	65.36	66.67	83.86	88.52	107.21	69.51	52.2	63.02	67.03	62.95	49.26	77.47	75.01	67.87	87.96	52.1	56.24	56.36	69.58	75.6
