# Supplementary material for: Network structure underpinning (dys)homeostasis in chronic fatigue syndrome; Preliminary findings
Source: PLoS One. 2019 Mar 25;14(3):e0213724. doi: 10.1371/journal.pone.0213724 (PMC6433252; doi:10.1371/journal.pone.0213724)
Supplement: S5 Table — (DOCX) [file pone.0213724.s005.docx]

| Supplementary table 5   | Node | Betweenness  Centrality | Closeness  Centrality | Neighborhood  Connectivity | Stress | Topological  Coefficient | | --- | --- | --- | --- | --- | --- | | BPV | 0.00 | 0.33 | 3.00 | 0 | 0.00 | | BEI | 0.00 | 0.30 | 5.00 | 0 | 0.00 | | MASS | 0.00 | 0.30 | 5.00 | 0 | 0.00 | | SV | 0.26 | 0.43 | 1.60 | 152 | 0.30 | | AUCg | 0.00 | 0.37 | 9.00 | 0 | 0.00 | | DEX100 | 0.09 | 0.45 | 7.00 | 62 | 0.55 | | DEX10 | 0.00 | 0.37 | 9.00 | 0 | 0.00 | | Null | 0.09 | 0.45 | 7.00 | 62 | 0.55 | | HRV | 0.00 | 0.37 | 9.00 | 0 | 0.00 | | EF | 0.55 | 0.57 | 1.78 | 340 | 0.26 | | CFQ | 0.15 | 0.47 | 5.67 | 94 | 0.42 | | LPS | 0.04 | 0.45 | 8.00 | 44 | 0.64 | | IL12 | 0.04 | 0.45 | 8.00 | 44 | 0.64 | | IL1b | 0.00 | 0.34 | 7.00 | 0 | 0.00 | | IL17 | 0.11 | 0.43 | 6.00 | 60 | 0.50 | | IFNg | 0.04 | 0.45 | 8.00 | 44 | 0.64 | | SBPv | 0.00 | 0.34 | 7.00 | 0 | 0.00 | | SBPa | 0.35 | 0.50 | 1.86 | 232 | 0.29 | | |  | |
| --- | --- | --- | --- | --- | --- | --- | --- | --- | --- | --- | --- | --- | --- | --- | --- | --- | --- | --- | --- | --- | --- | --- | --- | --- | --- | --- | --- | --- | --- | --- | --- | --- | --- | --- | --- | --- | --- | --- | --- | --- | --- | --- | --- | --- | --- | --- | --- | --- | --- | --- | --- | --- | --- | --- | --- | --- | --- | --- | --- | --- | --- | --- | --- | --- | --- | --- | --- | --- | --- | --- | --- | --- | --- | --- | --- | --- | --- | --- | --- | --- | --- | --- | --- | --- | --- | --- | --- | --- | --- | --- | --- | --- | --- | --- | --- | --- | --- | --- | --- | --- | --- | --- | --- | --- | --- | --- | --- | --- | --- | --- | --- | --- | --- | --- | --- | --- | --- |
|  | |  | |
|  | |  | |
|  | |  | |
|  | |  | |
|  | |  | |
|  | |  | |
|  | |  | |
|  | |  | |
|  | |  | |
|  | |  | |
|  | |  | |
|  | |  | |
|  | |  | |
|  | |  | |
|  | |  | |
|  | |  | |
|  | |  | |
